# Supplementary material
Source: PubMed Central journal article supplement (PMC4363405)
Supplement: IAI.03138-14_zii999091179so1.pdf [file IAI.03138-14_zii999091179so1.pdf]

independent experiments. (B) Upper panel: western blot analysis of Akt phosphorylation in mock-treated and Wortmannin-treated cells. Lower panel: Akt phosphorylation levels were quantified in mock-treated and Wortmannin-treated cells using ImageJ software analysis and normalized to the total Akt levels. Graph showing Akt phosphorylation level in Wortmannin-treated cells calculated as percentile level of mock-treated cells (phospho Akt). Statistical analysis: Mock vs. Wort500  $p < 0.0001$ , Mock vs. Wort200  $p < 0.0001$ , Mock vs. Wort100  $p < 0.0005$ , Mock vs. Wort50  $p < 0.05$ , Mock vs. Wort25 NS, Mock vs. Wort12.5 NS. The experiment shows the inhibitory effect of Wortmannin on Akt phosphorylation in the 50-12.5 nM concentration range, with little to no effect on *Shigella* dissemination.

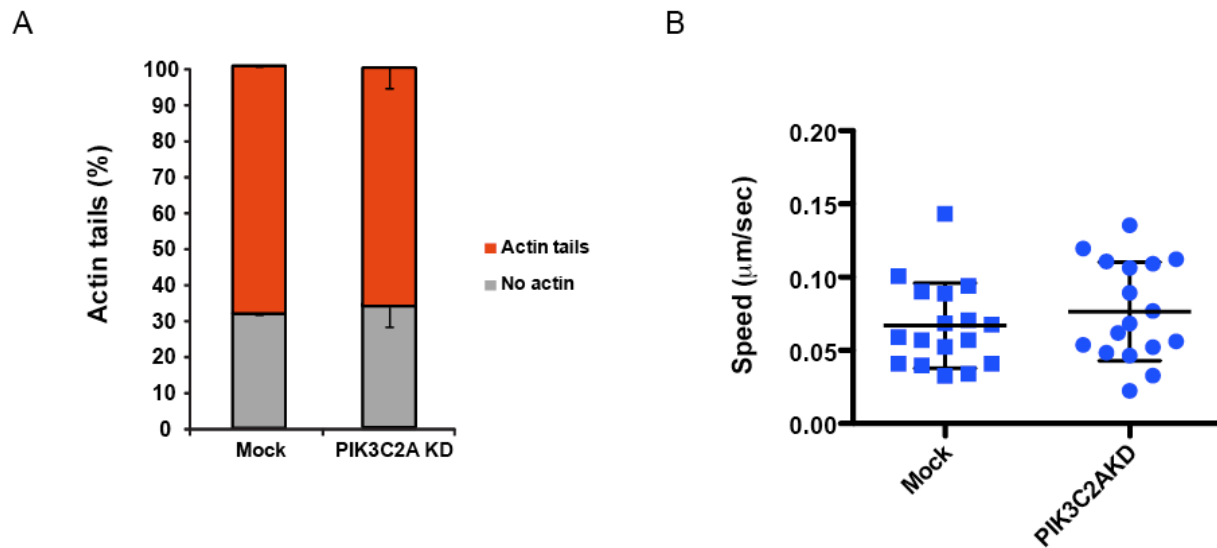

**Figure S2. PIK3C2A is not required for cytosolic motility**

(A) Graph showing counts of actin tails in mock-treated and PIK3C2A-depleted cells. Values represent the mean  $\pm$  SD of three independent experiments. (B) Graph showing measurements of *S. flexneri* velocity in the cytosol of mock-treated and PIK3C2A-depleted HT-29 cells. The

tracking module of the Volocity software was used to score motile bacteria and determine their velocity ( $\mu\text{m/s}$ ).

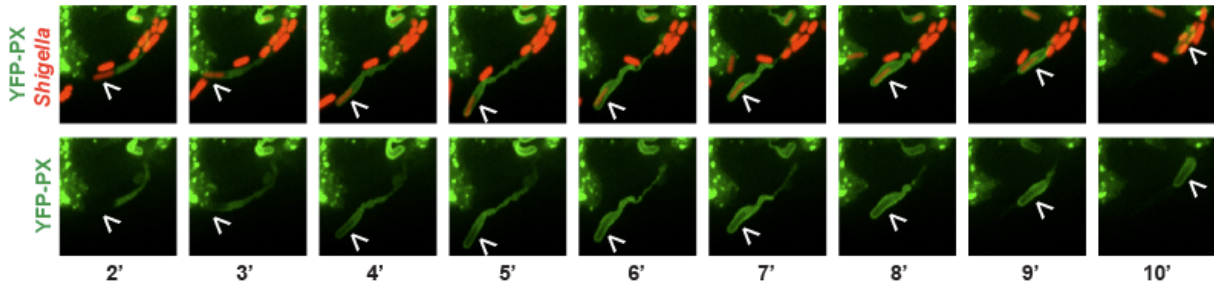

**Figure S3. Localization of YFP-PX in *S. flexneri* protrusions**

Representative time-lapse images of YFP-PX-expressing HT-29 cells (green) infected with RFP-PIK3C2A-expressing *S. flexneri* (red). Note the progressive YFP-PX enrichment in the plasma membrane surrounding protrusions overtime (arrowhead).

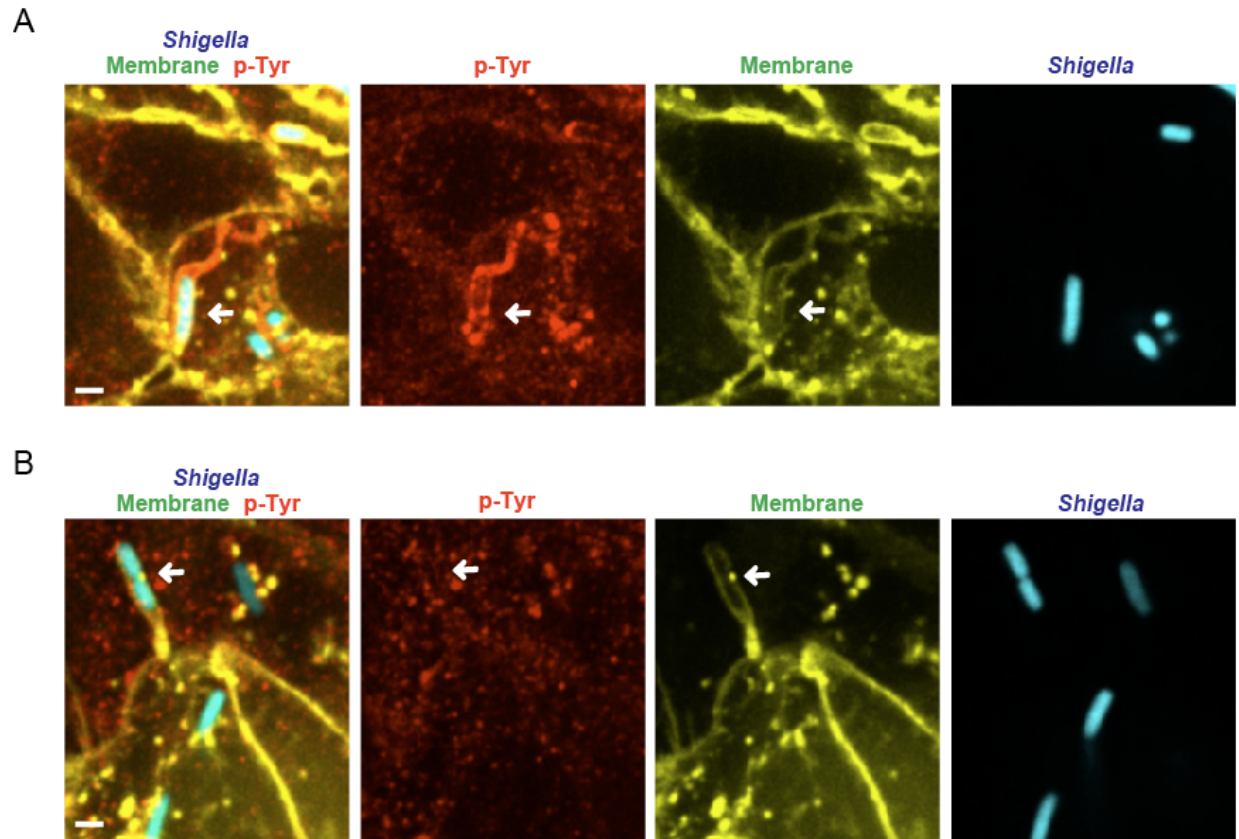

**Figure S4. Phospho-tyrosine residues in *S. flexneri* protrusions**

Representative images of HT-29 cells infected with CFP-expressing *S. flexneri* (blue) displaying protrusions (arrows, membrane-YFP, yellow) that scored (A) phospho-tyrosine positive (red) or (B) phospho-tyrosine negative (red), as counted in Figure 7C.

41 **Supplementary movies**

42

43 **Movie S1. Time lapse imaging of protrusion resolution into vacuole through VLP**  
44 **formation**

45 HT-29 cell expressing membrane GFP (yellow) were infected with RFP-expressing *Shigella*  
46 *flexneri* and imaged every five minutes. Scale bar: 5  $\mu$ m. The movie shows the formation of a  
47 protrusion that successfully transitions into a Vacuole-Like-Protrusion (VLP) and resolve into a  
48 vacuole.

49

50 **Movie S2. Time lapse imaging of unsuccessful protrusions resolution into vacuole**

51 HT-29 cell expressing membrane GFP (yellow) were infected with RFP-expressing *Shigella*  
52 *flexneri* and imaged every five minutes. Scale bar: 5  $\mu$ m. The movie shows the formation of a  
53 protrusion that fails to transitions into a Vacuole-Like-Protrusion (VLP) and retracts bringing the  
54 pathogen back to the primary infected cell.

55

56
